# Supplementary material for: Potential Chemopreventive Activity of a New Macrolide Antibiotic from a Marine-Derived Micromonospora sp
Source: MDPI journal article supplement (doi:10.3390/md11041152), 2013-04-03
Supplement: s2 [file s2]

marinedrugs-11-01152-s001.mol
  corina  04151404563D 1   1.00000     0.00000 
CORINA 3.49 0023  12.04.2013
 39 41  0  0  0  0  0  0  0  0999 V2000
   -0.1149    1.3151    0.0831 C   0  0  0  0  0  0  0  0  0  0  0  0
   -0.1213   -0.0196    0.0945 C   0  0  0  0  0  0  0  0  0  0  0  0
    0.6455    3.9944    1.4850 C   0  0  0  0  0  0  0  0  0  0  0  0
    1.1649    3.5450    0.1183 C   0  0  0  0  0  0  0  0  0  0  0  0
    1.1566    2.0369    0.0529 C   0  0  0  0  0  0  0  0  0  0  0  0
   -2.6974    5.1752    2.5470 C   0  0  0  0  0  0  0  0  0  0  0  0
   -1.1798    5.2500    2.6539 C   0  0  0  0  0  0  0  0  0  0  0  0
   -0.4811    5.0179    1.3182 C   0  0  0  0  0  0  0  0  0  0  0  0
   -4.8629    1.6622    1.5534 O   0  0  0  0  0  0  0  0  0  0  0  0
   -4.5412    2.3842    0.6415 C   0  0  0  0  0  0  0  0  0  0  0  0
   -4.1209    3.8089    0.9610 C   0  0  0  0  0  0  0  0  0  0  0  0
   -3.1928    3.7888    2.1724 C   0  0  0  0  0  0  0  0  0  0  0  0
   -2.5804   -0.2475   -0.7217 C   0  0  0  0  0  0  0  0  0  0  0  0
   -4.0239   -0.3930   -0.2507 C   0  0  0  0  0  0  0  0  0  0  0  0
   -4.9024    0.6267   -0.9856 C   0  0  0  0  0  0  0  0  0  0  0  0
   -4.5449    1.9734   -0.6291 O   0  0  0  0  0  0  0  0  0  0  0  0
   -7.2560    1.2911   -1.5034 C   0  0  0  0  0  0  0  0  0  0  0  0
   -6.3767    0.3539   -0.6731 C   0  0  0  0  0  0  0  0  0  0  0  0
   -1.4322   -0.7650    0.1426 C   0  0  0  0  0  0  0  0  0  0  0  0
   -1.7569   -1.4010    1.4938 C   0  0  0  0  0  0  0  0  0  0  0  0
   -4.5369   -1.8030   -0.5622 C   0  0  0  0  0  0  0  0  0  0  0  0
   -1.8593   -1.4423   -1.0412 O   0  0  0  0  0  0  0  0  0  0  0  0
   -3.2246    6.2511    1.6009 C   0  0  0  0  0  0  0  0  0  0  0  0
   -2.1000    2.9075    1.9101 O   0  0  0  0  0  0  0  0  0  0  0  0
   -0.7138    4.3189    3.6315 O   0  0  0  0  0  0  0  0  0  0  0  0
    0.1252    6.3427    0.8333 C   0  0  0  0  0  0  0  0  0  0  0  0
    1.2127    6.7937    1.8104 C   0  0  0  0  0  0  0  0  0  0  0  0
    2.6005    4.0425   -0.0774 C   0  0  0  0  0  0  0  0  0  0  0  0
    2.2026    1.4261   -0.0202 O   0  0  0  0  0  0  0  0  0  0  0  0
    0.4955    6.5134    6.2673 C   0  0  0  0  0  0  0  0  0  0  0  0
    0.9302    5.4694    7.2991 C   0  0  0  0  0  0  0  0  0  0  0  0
   -0.1032    4.3393    7.3371 C   0  0  0  0  0  0  0  0  0  0  0  0
   -0.2451    3.7447    5.9326 C   0  0  0  0  0  0  0  0  0  0  0  0
   -0.6344    4.8553    4.9536 C   0  0  0  0  0  0  0  0  0  0  0  0
    0.3524    5.8883    4.9902 O   0  0  0  0  0  0  0  0  0  0  0  0
   -0.8429    7.1223    6.6902 C   0  0  0  0  0  0  0  0  0  0  0  0
    2.2054    4.9383    6.9330 O   0  0  0  0  0  0  0  0  0  0  0  0
    0.3314    3.3244    8.2443 O   0  0  0  0  0  0  0  0  0  0  0  0
    0.9989    3.1679    5.5304 O   0  0  0  0  0  0  0  0  0  0  0  0
  1  2  2  0      
  3  4  1  0      
  4  5  1  0      
  5  1  1  0      
  6  7  1  0      
  7  8  1  0      
  8  3  1  0      
  9 10  2  0      
 10 11  1  0      
 11 12  1  0      
 12  6  1  0      
 13 14  1  0      
 14 15  1  0      
 15 16  1  0      
 16 10  1  0      
 17 18  1  0      
 13 19  1  0      
 19 20  1  0      
  2 19  1  0      
 14 21  1  0      
 19 22  1  0      
 13 22  1  0      
 15 18  1  0      
  6 23  1  0      
 12 24  1  0      
  7 25  1  0      
  8 26  1  0      
 26 27  1  0      
  4 28  1  0      
  5 29  2  0      
 30 31  1  0      
 34 35  1  0      
 35 30  1  0      
 25 34  1  0      
 30 36  1  0      
 31 37  1  0      
 32 38  1  0      
 33 39  1  0      
 34 33  1  0      
 33 32  1  0      
 31 32  1  0      
M  END
$$$$
