# Supplementary material for: Potential Chemopreventive Activity of a New Macrolide Antibiotic from a Marine-Derived Micromonospora sp
Source: MDPI journal article supplement (doi:10.3390/md11041152), 2013-04-03
Supplement: s3 [file s3]

marinedrugs-11-01152-s001.mol
  ChemDraw03101420542D

 39 41  0  0  0  0  0  0  0  0999 V2000
   -0.0022    2.5750    0.0000 C   0  0  0  0  0  0  0  0  0  0  0  0
   -0.0022    1.7500    0.0000 C   0  0  0  0  0  0  0  0  0  0  0  0
    1.4268    1.7500    0.0000 C   0  0  0  0  0  0  0  0  0  0  0  0
    1.4268    2.5750    0.0000 C   0  0  0  0  0  0  0  0  0  0  0  0
    0.7123    2.9875    0.0000 C   0  0  0  0  0  0  0  0  0  0  0  0
    1.4268    0.1000    0.0000 C   0  0  0  0  0  0  0  0  0  0  0  0
    2.1412    0.5125    0.0000 C   0  0  0  0  0  0  0  0  0  0  0  0
    2.1412    1.3375    0.0000 C   0  0  0  0  0  0  0  0  0  0  0  0
   -0.0022    0.1000    0.0000 O   0  0  0  0  0  0  0  0  0  0  0  0
   -0.0022   -0.7250    0.0000 C   0  0  0  0  0  0  0  0  0  0  0  0
    0.7123   -1.1375    0.0000 C   0  0  0  0  0  0  0  0  0  0  0  0
    1.4268   -0.7250    0.0000 C   0  0  0  0  0  0  0  0  0  0  0  0
   -0.7166    0.5125    0.0000 C   0  0  0  0  0  0  0  0  0  0  0  0
   -1.4311    0.1000    0.0000 C   0  0  0  0  0  0  0  0  0  0  0  0
   -1.4311   -0.7250    0.0000 C   0  0  0  0  0  0  0  0  0  0  0  0
   -0.7166   -1.1375    0.0000 O   0  0  0  0  0  0  0  0  0  0  0  0
   -2.8601   -0.7250    0.0000 C   0  0  0  0  0  0  0  0  0  0  0  0
   -2.1456   -1.1375    0.0000 C   0  0  0  0  0  0  0  0  0  0  0  0
   -0.7166    1.3375    0.0000 C   0  0  0  0  0  0  0  0  0  0  0  0
   -1.4311    1.7500    0.0000 C   0  0  0  0  0  0  0  0  0  0  0  0
   -2.1456    0.5125    0.0000 C   0  0  0  0  0  0  0  0  0  0  0  0
   -1.4311    0.9250    0.0000 O   0  0  0  0  0  0  0  0  0  0  0  0
    0.7123    0.5125    0.0000 C   0  0  0  0  0  0  0  0  0  0  0  0
    2.1412   -1.1375    0.0000 O   0  0  0  0  0  0  0  0  0  0  0  0
    2.8557    0.1000    0.0000 O   0  0  0  0  0  0  0  0  0  0  0  0
    2.8557    1.7500    0.0000 C   0  0  0  0  0  0  0  0  0  0  0  0
    2.8557    2.5750    0.0000 C   0  0  0  0  0  0  0  0  0  0  0  0
    2.1412    2.9875    0.0000 C   0  0  0  0  0  0  0  0  0  0  0  0
    0.7123    3.8125    0.0000 O   0  0  0  0  0  0  0  0  0  0  0  0
    1.2686   -2.2731    0.0000 C   0  0  0  0  0  0  0  0  0  0  0  0
    0.8561   -2.9875    0.0000 C   0  0  0  0  0  0  0  0  0  0  0  0
    1.6494   -2.7608    0.0000 C   0  0  0  0  0  0  0  0  0  0  0  0
    2.4475   -2.9875    0.0000 C   0  0  0  0  0  0  0  0  0  0  0  0
    2.8601   -2.2731    0.0000 C   0  0  0  0  0  0  0  0  0  0  0  0
    2.0667   -2.4997    0.0000 O   0  0  0  0  0  0  0  0  0  0  0  0
    0.4718   -2.4866    0.0000 C   0  0  0  0  0  0  0  0  0  0  0  0
    0.0593   -2.7740    0.0000 O   0  0  0  0  0  0  0  0  0  0  0  0
    1.2369   -3.4753    0.0000 O   0  0  0  0  0  0  0  0  0  0  0  0
    2.4475   -3.8125    0.0000 O   0  0  0  0  0  0  0  0  0  0  0  0
  1  2  2  0      
  3  4  1  0      
  4  5  1  0      
  5  1  1  0      
  6  7  1  0      
  7  8  1  0      
  8  3  1  0      
  9 10  2  0      
 10 11  1  0      
 11 12  1  0      
 12  6  1  0      
 13 14  1  0      
 14 15  1  0      
 15 16  1  0      
 16 10  1  0      
 17 18  1  0      
 13 19  1  0      
 19 20  1  0      
  2 19  1  0      
 14 21  1  1      
 19 22  1  1      
 13 22  1  1      
 15 18  1  6      
  6 23  1  6      
 12 24  1  6      
  7 25  1  6      
  8 26  1  6      
 26 27  1  0      
  4 28  1  6      
  5 29  2  0      
 30 31  1  0      
 34 35  1  0      
 35 30  1  0      
 25 34  1  0      
 30 36  1  0      
 31 37  1  0      
 32 38  1  0      
 33 39  1  0      
 34 33  1  1      
 33 32  1  1      
 31 32  1  1      
M  END
