# Supplementary material for: Potential Chemopreventive Activity of a New Macrolide Antibiotic from a Marine-Derived Micromonospora sp
Source: MDPI journal article supplement (doi:10.3390/md11041152), 2013-04-03
Supplement: s4 [file s4]

marinedrugs-11-01152-s002.mol
  corina  04151404573D 1   1.00000     0.00000 
CORINA 3.49 0023  12.04.2013
 38 39  0  0  0  0  0  0  0  0999 V2000
   -0.5834   -1.4624    0.5909 C   0  0  0  0  0  0  0  0  0  0  0  0
   -1.4658   -2.4726    0.3824 C   0  0  0  0  0  0  0  0  0  0  0  0
    1.0507    0.7036    0.9235 C   0  0  0  0  0  0  0  0  0  0  0  0
    1.5940   -0.5917    1.5297 C   0  0  0  0  0  0  0  0  0  0  0  0
    0.6115   -1.7092    1.2935 C   0  0  0  0  0  0  0  0  0  0  0  0
    1.1728    2.7736   -2.0476 C   0  0  0  0  0  0  0  0  0  0  0  0
    1.7878    2.4727   -0.6792 C   0  0  0  0  0  0  0  0  0  0  0  0
    1.7374    0.9660   -0.4183 C   0  0  0  0  0  0  0  0  0  0  0  0
   -3.2875    3.0607   -2.4300 O   0  0  0  0  0  0  0  0  0  0  0  0
   -2.4852    2.1966   -2.6938 C   0  0  0  0  0  0  0  0  0  0  0  0
   -1.0831    2.5693   -3.1015 C   0  0  0  0  0  0  0  0  0  0  0  0
   -0.3165    3.0820   -1.8806 C   0  0  0  0  0  0  0  0  0  0  0  0
   -2.9867   -0.9991   -0.7986 C   0  0  0  0  0  0  0  0  0  0  0  0
   -4.2703   -0.7501   -1.5483 C   0  0  0  0  0  0  0  0  0  0  0  0
   -4.2097    0.6208   -2.2242 C   0  0  0  0  0  0  0  0  0  0  0  0
   -2.8428    0.9047   -2.6231 O   0  0  0  0  0  0  0  0  0  0  0  0
   -6.0408    1.2836   -0.6588 C   0  0  0  0  0  0  0  0  0  0  0  0
   -4.6881    1.6940   -1.2442 C   0  0  0  0  0  0  0  0  0  0  0  0
   -2.7080   -2.2243   -0.3448 C   0  0  0  0  0  0  0  0  0  0  0  0
   -3.6780   -3.3529   -0.5846 C   0  0  0  0  0  0  0  0  0  0  0  0
   -4.4585   -1.8346   -2.6111 C   0  0  0  0  0  0  0  0  0  0  0  0
    1.3429    1.5585   -2.9615 C   0  0  0  0  0  0  0  0  0  0  0  0
   -0.8076    2.4365   -0.7041 O   0  0  0  0  0  0  0  0  0  0  0  0
    1.0502    3.1571    0.3355 O   0  0  0  0  0  0  0  0  0  0  0  0
    3.1612    0.4070   -0.3804 C   0  0  0  0  0  0  0  0  0  0  0  0
    3.9047    0.9866    0.8247 C   0  0  0  0  0  0  0  0  0  0  0  0
    1.7999   -0.4034    3.0340 C   0  0  0  0  0  0  0  0  0  0  0  0
    0.8504   -2.8249    1.7103 O   0  0  0  0  0  0  0  0  0  0  0  0
    3.4435    5.6452    1.4791 C   0  0  0  0  0  0  0  0  0  0  0  0
    2.5878    6.3741    2.5184 C   0  0  0  0  0  0  0  0  0  0  0  0
    1.1645    6.5340    1.9751 C   0  0  0  0  0  0  0  0  0  0  0  0
    0.6043    5.1515    1.6272 C   0  0  0  0  0  0  0  0  0  0  0  0
    1.5366    4.4698    0.6223 C   0  0  0  0  0  0  0  0  0  0  0  0
    2.8502    4.3805    1.1778 O   0  0  0  0  0  0  0  0  0  0  0  0
    3.5250    6.4871    0.2042 C   0  0  0  0  0  0  0  0  0  0  0  0
    2.5546    5.6137    3.7278 O   0  0  0  0  0  0  0  0  0  0  0  0
    0.3401    7.1479    2.9678 O   0  0  0  0  0  0  0  0  0  0  0  0
    0.5186    4.3587    2.8130 O   0  0  0  0  0  0  0  0  0  0  0  0
  1  2  2  0      
  3  4  1  0      
  4  5  1  0      
  5  1  1  0      
  6  7  1  0      
  7  8  1  0      
  8  3  1  0      
  9 10  2  0      
 10 11  1  0      
 11 12  1  0      
 12  6  1  0      
 13 14  1  0      
 14 15  1  0      
 15 16  1  0      
 16 10  1  0      
 17 18  1  0      
 13 19  2  0      
 19 20  1  0      
  2 19  1  0      
 14 21  1  0      
 15 18  1  0      
  6 22  1  0      
 12 23  1  0      
  7 24  1  0      
  8 25  1  0      
 25 26  1  0      
  4 27  1  0      
  5 28  2  0      
 29 30  1  0      
 33 34  1  0      
 34 29  1  0      
 24 33  1  0      
 29 35  1  0      
 30 36  1  0      
 31 37  1  0      
 32 38  1  0      
 33 32  1  0      
 32 31  1  0      
 30 31  1  0      
M  END
$$$$
